# Supplementary material
Source: publisher site journal article supplement (https://static.cambridge.org/content/id/urn:cambridge.org:id:article:S0047279418000843/resource/name/S0047279418000843supp001.docx)
Supplement: Supplementary file 1 [file S0047279418000843supp001.docx]

Appendix A

Table A.1: Local labor market indicator, Pearson correlations

|  | Rate of minimum wage earner 2003 | Average wage for salaried women 2003 | Average income per capita 2003 |
| --- | --- | --- | --- |
| Job seekers rate 2003 | .640** | -.760** | -.543** |
| Rate of minimum wage earner 2003 |  | -.886** | -.863** |
| Average wage for salaried women 2003 |  |  | .865** |

**p<.001

Table A.2: Changes in the average predicted probabilities by individual and local labor market characteristics

|  | Chronically-dependent | Long-termers | Mid-termers | Short-termers |
| --- | --- | --- | --- | --- |
| **Base-line probabilities** (average respondent) | 0.301493 | 0.2389882 | 0.2117742 | 0.247745 |
| **Local area indicators** |  |  |  |  |
| Child-care coverage rate | 0.000869 | -0.0015765 | -0.0000434 | 0.000751 |
| Jobseekers' rate | 0.031098 | 0.0072471 | -0.0064067 | -0.03194 |
| Employees earning up to the MW' rate | -0.00121 | -0.0000584 | 0.0006364 | 0.000631 |
| Jobseekers' rate -% change | 0.001732 | -0.0000708 | -0.0013056 | -0.00036 |
| Employees earning up to the MW' rate- % change | -0.00189 | 0.0003205 | 0.0019294 | -0.00036 |
| **Individual characteristics** |  |  |  |  |
| Never married mother (=1) | 0.059224 | 0.0291844 | -0.0042174 | -0.08419 |
| Age | 0.015075 | -0.0003448 | -0.0058235 | -0.00891 |
| Number of children | 0.003473 | 0.0083649 | -0.0046305 | -0.00721 |
| Age of youngest child | -0.00322 | 0.0023347 | 0.0018235 | -0.00094 |
| Immigrant (=1) | 0.055561 | 0.0114111 | -0.0119603 | -0.05501 |
| Months of work 2000-2002 | -0.00289 | -0.0010752 | 0.0008901 | 0.003072 |
| Months on ISB 2000-2002 | 0.004459 | 0.0003352 | -0.001205 | -0.00359 |
| Exemption from work test (=1) | 0.017478 | -0.0087294 | -0.0309584 | 0.022209 |
| Birth of a child (=1) | 0.05785 | 0.0615048 | 0.0321785 | -0.15153 |
| Decrease in number of eligible children (=1) | -0.02521 | 0.0099621 | 0.0344426 | -0.0192 |
